# Supplementary material
Source: publisher figshare collection journal article supplement (https://acs.figshare.com/ndownloader/files/4525231)
Supplement: Supplementary file 1 [file 4525231]

data_090622c

 

_audit_creation_method            SHELXL-97

_chemical_name_systematic

;

 ?

;

_chemical_name_common             ?

_chemical_melting_point           ?

_chemical_formula_moiety          ?

_chemical_formula_sum

 'C18 H21 O6'

_chemical_formula_weight          333.35

 

loop_

 _atom_type_symbol

 _atom_type_description

 _atom_type_scat_dispersion_real

 _atom_type_scat_dispersion_imag

 _atom_type_scat_source

 'C'  'C'   0.0033   0.0016

 'International Tables Vol C Tables 4.2.6.8 and 6.1.1.4'

 'H'  'H'   0.0000   0.0000

 'International Tables Vol C Tables 4.2.6.8 and 6.1.1.4'

 'O'  'O'   0.0106   0.0060

 'International Tables Vol C Tables 4.2.6.8 and 6.1.1.4'

 

_symmetry_cell_setting            Monoclinic

_symmetry_space_group_name_H-M    Pc

 

loop_

 _symmetry_equiv_pos_as_xyz

 'x, y, z'

 'x, -y, z+1/2'

 

_cell_length_a                    7.4578(12)

_cell_length_b                    15.834(3)

_cell_length_c                    7.0431(12)

_cell_angle_alpha                 90.00

_cell_angle_beta                  111.745(2)

_cell_angle_gamma                 90.00

_cell_volume                      772.5(2)

_cell_formula_units_Z             2

_cell_measurement_temperature     298(2)

_cell_measurement_reflns_used     1238

_cell_measurement_theta_min       2.57

_cell_measurement_theta_max       23.13

 

_exptl_crystal_description        block

_exptl_crystal_colour             colourless

_exptl_crystal_size_max           0.14

_exptl_crystal_size_mid           0.08

_exptl_crystal_size_min           0.06

_exptl_crystal_density_meas       0

_exptl_crystal_density_diffrn     1.433

_exptl_crystal_density_method     'not measured'

_exptl_crystal_F_000              354

_exptl_absorpt_coefficient_mu     0.107

_exptl_absorpt_correction_type    multi-scan

_exptl_absorpt_correction_T_min   0.9851

_exptl_absorpt_correction_T_max   0.9936

_exptl_absorpt_process_details    sadabs

 

_exptl_special_details

;

 ?

;

 

_diffrn_ambient_temperature       298(2)

_diffrn_radiation_wavelength      0.71073

_diffrn_radiation_type            MoK\a

_diffrn_radiation_source          'fine-focus sealed tube'

_diffrn_radiation_monochromator   graphite

_diffrn_measurement_device_type   'CCD area detector'

_diffrn_measurement_method        'phi and omega scans'

_diffrn_detector_area_resol_mean  ?

_diffrn_standards_number          ?

_diffrn_standards_interval_count  ?

_diffrn_standards_interval_time   ?

_diffrn_standards_decay_%         ?

_diffrn_reflns_number             4909

_diffrn_reflns_av_R_equivalents   0.0274

_diffrn_reflns_av_sigmaI/netI     0.0526

_diffrn_reflns_limit_h_min        -9

_diffrn_reflns_limit_h_max        9

_diffrn_reflns_limit_k_min        -20

_diffrn_reflns_limit_k_max        16

_diffrn_reflns_limit_l_min        -9

_diffrn_reflns_limit_l_max        8

_diffrn_reflns_theta_min          2.57

_diffrn_reflns_theta_max          28.33

_reflns_number_total              3116

_reflns_number_gt                 2181

_reflns_threshold_expression      >2sigma(I)

 

_computing_data_collection        'Bruker apex II'

_computing_cell_refinement        'Bruker apex II'

_computing_data_reduction         'Bruker SAINT'

_computing_structure_solution     'SHELXS-97 (Sheldrick, 1990)'

_computing_structure_refinement   'SHELXL-97 (Sheldrick, 1997)'

_computing_molecular_graphics     'Bruker SHELXTL'

_computing_publication_material   'Bruker SHELXTL'

 

_refine_special_details

;

 Refinement of F^2^ against ALL reflections.  The weighted R-factor wR and

 goodness of fit S are based on F^2^, conventional R-factors R are based

 on F, with F set to zero for negative F^2^. The threshold expression of

 F^2^ > 2sigma(F^2^) is used only for calculating R-factors(gt) etc. and is

 not relevant to the choice of reflections for refinement.  R-factors based

 on F^2^ are statistically about twice as large as those based on F, and R-

 factors based on ALL data will be even larger.

;

 

_refine_ls_structure_factor_coef  Fsqd

_refine_ls_matrix_type            full

_refine_ls_weighting_scheme       calc

_refine_ls_weighting_details

 'calc w=1/[\s^2^(Fo^2^)+(0.1000P)^2^+0.0800P] where P=(Fo^2^+2Fc^2^)/3'

_atom_sites_solution_primary      direct

_atom_sites_solution_secondary    difmap

_atom_sites_solution_hydrogens    geom

_refine_ls_hydrogen_treatment     constr

_refine_ls_extinction_method      SHELXL

_refine_ls_extinction_coef        0.020(6)

_refine_ls_extinction_expression

 'Fc^*^=kFc[1+0.001xFc^2^\l^3^/sin(2\q)]^-1/4^'

_refine_ls_abs_structure_details

 'Flack H D (1983), Acta Cryst. A39, 876-881'

_refine_ls_abs_structure_Flack    -0.7(15)

_refine_ls_number_reflns          3116

_refine_ls_number_parameters      221

_refine_ls_number_restraints      2

_refine_ls_R_factor_all           0.0771

_refine_ls_R_factor_gt            0.0498

_refine_ls_wR_factor_ref          0.1550

_refine_ls_wR_factor_gt           0.1312

_refine_ls_goodness_of_fit_ref    0.890

_refine_ls_restrained_S_all       0.890

_refine_ls_shift/su_max           0.000

_refine_ls_shift/su_mean          0.000

 

loop_

 _atom_site_label

 _atom_site_type_symbol

 _atom_site_fract_x

 _atom_site_fract_y

 _atom_site_fract_z

 _atom_site_U_iso_or_equiv

 _atom_site_adp_type

 _atom_site_occupancy

 _atom_site_symmetry_multiplicity

 _atom_site_calc_flag

 _atom_site_refinement_flags

 _atom_site_disorder_assembly

 _atom_site_disorder_group

O1 O 0.8779(4) 0.37995(17) 0.7667(4) 0.0613(7) Uani 1 1 d . . .

O2 O 1.0853(4) 0.40795(18) 0.6221(5) 0.0641(8) Uani 1 1 d . . .

O3 O 0.4066(4) -0.05450(16) 0.2392(5) 0.0652(8) Uani 1 1 d . . .

O4 O 0.3355(3) 0.08030(15) 0.2156(4) 0.0519(6) Uani 1 1 d . . .

O5 O 0.5252(3) 0.33468(15) 0.3809(4) 0.0471(6) Uani 1 1 d . . .

O6 O 0.6609(4) 0.17443(17) -0.0165(4) 0.0596(7) Uani 1 1 d . . .

H6 H 0.5901 0.1348 -0.0717 0.089 Uiso 1 1 calc R . .

C1 C 0.9351(5) 0.3634(2) 0.6333(5) 0.0477(8) Uani 1 1 d . . .

C3 C 1.1461(6) 0.3981(3) 0.4474(7) 0.0745(14) Uani 1 1 d . . .

H3A H 1.1964 0.4515 0.4214 0.089 Uiso 1 1 calc R . .

H3B H 1.2496 0.3569 0.4817 0.089 Uiso 1 1 calc R . .

C4 C 0.9885(6) 0.3709(3) 0.2617(6) 0.0623(11) Uani 1 1 d . . .

H4 H 0.9878 0.3874 0.1347 0.075 Uiso 1 1 calc R . .

C5 C 0.8472(5) 0.3233(2) 0.2723(5) 0.0429(7) Uani 1 1 d . . .

H5 H 0.8969 0.2710 0.2357 0.051 Uiso 1 1 calc R . .

C6 C 0.8606(4) 0.2916(2) 0.4815(5) 0.0390(7) Uani 1 1 d . . .

C7 C 1.0005(5) 0.2150(2) 0.5653(5) 0.0462(8) Uani 1 1 d . . .

H7 H 1.1289 0.2327 0.5730 0.055 Uiso 1 1 calc R . .

C8 C 0.9383(5) 0.1414(2) 0.4168(6) 0.0517(9) Uani 1 1 d . . .

H8A H 0.9572 0.1561 0.2918 0.062 Uiso 1 1 calc R . .

H8B H 1.0184 0.0927 0.4762 0.062 Uiso 1 1 calc R . .

C9 C 0.7319(4) 0.1191(2) 0.3675(5) 0.0419(7) Uani 1 1 d . . .

C10 C 0.6699(5) 0.0408(2) 0.3668(6) 0.0507(9) Uani 1 1 d . . .

H10 H 0.7599 -0.0014 0.4259 0.061 Uiso 1 1 calc R . .

C11 C 0.4643(5) 0.0179(2) 0.2763(6) 0.0500(9) Uani 1 1 d . . .

C13 C 0.3975(4) 0.1614(2) 0.3126(6) 0.0473(8) Uani 1 1 d . . .

H13A H 0.4106 0.1577 0.4546 0.057 Uiso 1 1 calc R . .

H13B H 0.2989 0.2032 0.2464 0.057 Uiso 1 1 calc R . .

C14 C 0.5894(4) 0.1909(2) 0.3029(5) 0.0379(7) Uani 1 1 d . . .

C15 C 0.6567(4) 0.26581(19) 0.4566(5) 0.0390(7) Uani 1 1 d . . .

H15 H 0.6556 0.2479 0.5894 0.047 Uiso 1 1 calc R . .

C17 C 0.5186(6) 0.3676(2) 0.1855(6) 0.0530(9) Uani 1 1 d . . .

H17 H 0.3862 0.3605 0.0872 0.064 Uiso 1 1 calc R . .

C18 C 0.6499(5) 0.3143(2) 0.1106(5) 0.0483(8) Uani 1 1 d . . .

H18 H 0.6483 0.3357 -0.0206 0.058 Uiso 1 1 calc R . .

C19 C 0.5708(5) 0.2249(2) 0.0864(5) 0.0443(8) Uani 1 1 d . . .

H19 H 0.4330 0.2276 0.0014 0.053 Uiso 1 1 calc R . .

C20 C 0.5595(9) 0.4605(3) 0.2069(8) 0.0816(15) Uani 1 1 d . . .

H20A H 0.4616 0.4885 0.2415 0.122 Uiso 1 1 calc R . .

H20B H 0.5599 0.4825 0.0801 0.122 Uiso 1 1 calc R . .

H20C H 0.6833 0.4700 0.3129 0.122 Uiso 1 1 calc R . .

C21 C 1.0180(6) 0.1881(3) 0.7775(7) 0.0660(11) Uani 1 1 d . . .

H21A H 0.8942 0.1698 0.7746 0.099 Uiso 1 1 calc R . .

H21B H 1.0622 0.2349 0.8698 0.099 Uiso 1 1 calc R . .

H21C H 1.1086 0.1424 0.8229 0.099 Uiso 1 1 calc R . .

 

loop_

 _atom_site_aniso_label

 _atom_site_aniso_U_11

 _atom_site_aniso_U_22

 _atom_site_aniso_U_33

 _atom_site_aniso_U_23

 _atom_site_aniso_U_13

 _atom_site_aniso_U_12

O1 0.0774(19) 0.0723(17) 0.0419(15) -0.0129(12) 0.0311(14) -0.0036(13)

O2 0.0677(16) 0.0790(19) 0.0527(16) -0.0235(14) 0.0308(14) -0.0248(14)

O3 0.0650(17) 0.0496(16) 0.075(2) 0.0012(13) 0.0187(15) -0.0127(13)

O4 0.0392(12) 0.0562(15) 0.0536(16) 0.0048(11) 0.0096(11) -0.0060(12)

O5 0.0491(13) 0.0522(14) 0.0437(13) 0.0095(10) 0.0214(11) 0.0142(10)

O6 0.0659(16) 0.0685(17) 0.0551(17) -0.0164(12) 0.0348(14) -0.0106(13)

C1 0.0502(19) 0.062(2) 0.0323(18) -0.0045(15) 0.0170(16) -0.0036(16)

C3 0.064(3) 0.102(3) 0.066(3) -0.030(2) 0.035(2) -0.040(3)

C4 0.076(3) 0.075(3) 0.051(2) -0.0189(19) 0.041(2) -0.026(2)

C5 0.0512(18) 0.0490(19) 0.0345(17) -0.0081(13) 0.0230(15) -0.0063(15)

C6 0.0352(14) 0.0460(18) 0.0385(17) -0.0034(13) 0.0170(13) -0.0012(14)

C7 0.0327(15) 0.060(2) 0.0434(19) -0.0057(15) 0.0109(15) 0.0004(14)

C8 0.0366(17) 0.057(2) 0.063(2) -0.0061(17) 0.0195(17) 0.0069(15)

C9 0.0371(17) 0.0464(19) 0.043(2) -0.0002(13) 0.0161(15) 0.0047(14)

C10 0.0414(18) 0.048(2) 0.056(2) 0.0032(16) 0.0099(16) 0.0057(15)

C11 0.049(2) 0.053(2) 0.048(2) 0.0081(16) 0.0180(17) 0.0007(17)

C13 0.0371(17) 0.053(2) 0.055(2) 0.0074(16) 0.0211(16) 0.0010(14)

C14 0.0326(15) 0.0430(17) 0.0415(18) 0.0034(13) 0.0175(14) 0.0012(13)

C15 0.0432(17) 0.0451(18) 0.0305(16) 0.0055(12) 0.0157(14) 0.0075(14)

C17 0.058(2) 0.057(2) 0.043(2) 0.0109(16) 0.0179(17) 0.0078(17)

C18 0.060(2) 0.054(2) 0.0316(17) -0.0015(14) 0.0185(16) -0.0074(17)

C19 0.0427(17) 0.057(2) 0.0324(17) 0.0016(14) 0.0135(14) -0.0036(15)

C20 0.132(4) 0.061(3) 0.064(3) 0.015(2) 0.050(3) 0.021(3)

C21 0.052(2) 0.080(3) 0.054(2) 0.005(2) 0.0063(18) 0.016(2)

 

_geom_special_details

;

 All esds (except the esd in the dihedral angle between two l.s. planes)

 are estimated using the full covariance matrix.  The cell esds are taken

 into account individually in the estimation of esds in distances, angles

 and torsion angles; correlations between esds in cell parameters are only

 used when they are defined by crystal symmetry.  An approximate (isotropic)

 treatment of cell esds is used for estimating esds involving l.s. planes.

;

 

loop_

 _geom_bond_atom_site_label_1

 _geom_bond_atom_site_label_2

 _geom_bond_distance

 _geom_bond_site_symmetry_2

 _geom_bond_publ_flag

O1 C1 1.196(4) . ?

O2 C1 1.351(4) . ?

O2 C3 1.469(5) . ?

O3 C11 1.218(4) . ?

O4 C11 1.333(4) . ?

O4 C13 1.448(4) . ?

O5 C15 1.431(4) . ?

O5 C17 1.456(4) . ?

O6 C19 1.406(4) . ?

O6 H6 0.8200 . ?

C1 C6 1.517(5) . ?

C3 C4 1.462(6) . ?

C3 H3A 0.9700 . ?

C3 H3B 0.9700 . ?

C4 C5 1.320(5) . ?

C4 H4 0.9300 . ?

C5 C18 1.497(5) . ?

C5 C6 1.525(4) . ?

C5 H5 0.9800 . ?

C6 C15 1.521(4) . ?

C6 C7 1.566(5) . ?

C7 C21 1.513(6) . ?

C7 C8 1.519(5) . ?

C7 H7 0.9800 . ?

C8 C9 1.489(5) . ?

C8 H8A 0.9700 . ?

C8 H8B 0.9700 . ?

C9 C10 1.322(5) . ?

C9 C14 1.507(4) . ?

C10 C11 1.471(5) . ?

C10 H10 0.9300 . ?

C13 C14 1.531(4) . ?

C13 H13A 0.9700 . ?

C13 H13B 0.9700 . ?

C14 C15 1.558(4) . ?

C14 C19 1.574(5) . ?

C15 H15 0.9800 . ?

C17 C20 1.498(6) . ?

C17 C18 1.528(5) . ?

C17 H17 0.9800 . ?

C18 C19 1.518(5) . ?

C18 H18 0.9800 . ?

C19 H19 0.9800 . ?

C20 H20A 0.9600 . ?

C20 H20B 0.9600 . ?

C20 H20C 0.9600 . ?

C21 H21A 0.9600 . ?

C21 H21B 0.9600 . ?

C21 H21C 0.9600 . ?

 

loop_

 _geom_angle_atom_site_label_1

 _geom_angle_atom_site_label_2

 _geom_angle_atom_site_label_3

 _geom_angle

 _geom_angle_site_symmetry_1

 _geom_angle_site_symmetry_3

 _geom_angle_publ_flag

C1 O2 C3 120.9(3) . . ?

C11 O4 C13 116.1(3) . . ?

C15 O5 C17 113.8(3) . . ?

C19 O6 H6 109.5 . . ?

O1 C1 O2 118.4(3) . . ?

O1 C1 C6 125.0(3) . . ?

O2 C1 C6 116.4(3) . . ?

C4 C3 O2 112.6(3) . . ?

C4 C3 H3A 109.1 . . ?

O2 C3 H3A 109.1 . . ?

C4 C3 H3B 109.1 . . ?

O2 C3 H3B 109.1 . . ?

H3A C3 H3B 107.8 . . ?

C5 C4 C3 120.8(4) . . ?

C5 C4 H4 119.6 . . ?

C3 C4 H4 119.6 . . ?

C4 C5 C18 126.3(3) . . ?

C4 C5 C6 118.3(3) . . ?

C18 C5 C6 113.4(3) . . ?

C4 C5 H5 94.6 . . ?

C18 C5 H5 94.6 . . ?

C6 C5 H5 94.6 . . ?

C1 C6 C15 111.8(3) . . ?

C1 C6 C5 108.0(3) . . ?

C15 C6 C5 105.8(3) . . ?

C1 C6 C7 107.2(3) . . ?

C15 C6 C7 109.5(2) . . ?

C5 C6 C7 114.5(3) . . ?

C21 C7 C8 110.9(3) . . ?

C21 C7 C6 113.1(3) . . ?

C8 C7 C6 110.1(3) . . ?

C21 C7 H7 107.5 . . ?

C8 C7 H7 107.5 . . ?

C6 C7 H7 107.5 . . ?

C9 C8 C7 111.6(3) . . ?

C9 C8 H8A 109.3 . . ?

C7 C8 H8A 109.3 . . ?

C9 C8 H8B 109.3 . . ?

C7 C8 H8B 109.3 . . ?

H8A C8 H8B 108.0 . . ?

C10 C9 C8 123.6(3) . . ?

C10 C9 C14 120.0(3) . . ?

C8 C9 C14 116.3(3) . . ?

C9 C10 C11 122.7(3) . . ?

C9 C10 H10 118.7 . . ?

C11 C10 H10 118.7 . . ?

O3 C11 O4 118.2(3) . . ?

O3 C11 C10 123.6(3) . . ?

O4 C11 C10 117.9(3) . . ?

O4 C13 C14 113.0(3) . . ?

O4 C13 H13A 109.0 . . ?

C14 C13 H13A 109.0 . . ?

O4 C13 H13B 109.0 . . ?

C14 C13 H13B 109.0 . . ?

H13A C13 H13B 107.8 . . ?

C9 C14 C13 108.8(3) . . ?

C9 C14 C15 110.8(3) . . ?

C13 C14 C15 105.5(2) . . ?

C9 C14 C19 110.5(2) . . ?

C13 C14 C19 113.5(3) . . ?

C15 C14 C19 107.6(2) . . ?

O5 C15 C6 110.9(2) . . ?

O5 C15 C14 108.7(2) . . ?

C6 C15 C14 109.6(2) . . ?

O5 C15 H15 109.2 . . ?

C6 C15 H15 109.2 . . ?

C14 C15 H15 109.2 . . ?

O5 C17 C20 108.8(3) . . ?

O5 C17 C18 109.1(3) . . ?

C20 C17 C18 116.4(4) . . ?

O5 C17 H17 107.4 . . ?

C20 C17 H17 107.4 . . ?

C18 C17 H17 107.4 . . ?

C5 C18 C19 114.0(3) . . ?

C5 C18 C17 105.0(3) . . ?

C19 C18 C17 106.4(3) . . ?

C5 C18 H18 110.4 . . ?

C19 C18 H18 110.4 . . ?

C17 C18 H18 110.4 . . ?

O6 C19 C18 110.4(3) . . ?

O6 C19 C14 114.7(3) . . ?

C18 C19 C14 108.6(3) . . ?

O6 C19 H19 107.7 . . ?

C18 C19 H19 107.7 . . ?

C14 C19 H19 107.7 . . ?

C17 C20 H20A 109.5 . . ?

C17 C20 H20B 109.5 . . ?

H20A C20 H20B 109.5 . . ?

C17 C20 H20C 109.5 . . ?

H20A C20 H20C 109.5 . . ?

H20B C20 H20C 109.5 . . ?

C7 C21 H21A 109.5 . . ?

C7 C21 H21B 109.5 . . ?

H21A C21 H21B 109.5 . . ?

C7 C21 H21C 109.5 . . ?

H21A C21 H21C 109.5 . . ?

H21B C21 H21C 109.5 . . ?

 

loop_

 _geom_torsion_atom_site_label_1

 _geom_torsion_atom_site_label_2

 _geom_torsion_atom_site_label_3

 _geom_torsion_atom_site_label_4

 _geom_torsion

 _geom_torsion_site_symmetry_1

 _geom_torsion_site_symmetry_2

 _geom_torsion_site_symmetry_3

 _geom_torsion_site_symmetry_4

 _geom_torsion_publ_flag

C3 O2 C1 O1 -172.2(4) . . . . ?

C3 O2 C1 C6 11.8(5) . . . . ?

C1 O2 C3 C4 26.5(6) . . . . ?

O2 C3 C4 C5 -30.3(7) . . . . ?

C3 C4 C5 C18 158.3(4) . . . . ?

C3 C4 C5 C6 -4.8(6) . . . . ?

O1 C1 C6 C15 23.7(5) . . . . ?

O2 C1 C6 C15 -160.5(3) . . . . ?

O1 C1 C6 C5 139.8(4) . . . . ?

O2 C1 C6 C5 -44.5(4) . . . . ?

O1 C1 C6 C7 -96.3(4) . . . . ?

O2 C1 C6 C7 79.5(4) . . . . ?

C4 C5 C6 C1 41.5(4) . . . . ?

C18 C5 C6 C1 -123.7(3) . . . . ?

C4 C5 C6 C15 161.4(3) . . . . ?

C18 C5 C6 C15 -3.8(3) . . . . ?

C4 C5 C6 C7 -77.9(4) . . . . ?

C18 C5 C6 C7 116.8(3) . . . . ?

C1 C6 C7 C21 57.2(4) . . . . ?

C15 C6 C7 C21 -64.3(4) . . . . ?

C5 C6 C7 C21 177.1(3) . . . . ?

C1 C6 C7 C8 -178.1(3) . . . . ?

C15 C6 C7 C8 60.4(4) . . . . ?

C5 C6 C7 C8 -58.2(4) . . . . ?

C21 C7 C8 C9 72.3(4) . . . . ?

C6 C7 C8 C9 -53.7(4) . . . . ?

C7 C8 C9 C10 -133.7(4) . . . . ?

C7 C8 C9 C14 50.2(4) . . . . ?

C8 C9 C10 C11 -166.5(4) . . . . ?

C14 C9 C10 C11 9.4(5) . . . . ?

C13 O4 C11 O3 162.2(3) . . . . ?

C13 O4 C11 C10 -23.4(4) . . . . ?

C9 C10 C11 O3 165.7(4) . . . . ?

C9 C10 C11 O4 -8.3(5) . . . . ?

C11 O4 C13 C14 52.3(4) . . . . ?

C10 C9 C14 C13 18.3(4) . . . . ?

C8 C9 C14 C13 -165.5(3) . . . . ?

C10 C9 C14 C15 133.8(3) . . . . ?

C8 C9 C14 C15 -50.0(4) . . . . ?

C10 C9 C14 C19 -107.0(4) . . . . ?

C8 C9 C14 C19 69.2(4) . . . . ?

O4 C13 C14 C9 -47.7(4) . . . . ?

O4 C13 C14 C15 -166.6(3) . . . . ?

O4 C13 C14 C19 75.8(3) . . . . ?

C17 O5 C15 C6 58.3(3) . . . . ?

C17 O5 C15 C14 -62.2(3) . . . . ?

C1 C6 C15 O5 61.1(4) . . . . ?

C5 C6 C15 O5 -56.3(3) . . . . ?

C7 C6 C15 O5 179.8(2) . . . . ?

C1 C6 C15 C14 -178.9(3) . . . . ?

C5 C6 C15 C14 63.7(3) . . . . ?

C7 C6 C15 C14 -60.2(3) . . . . ?

C9 C14 C15 O5 175.6(2) . . . . ?

C13 C14 C15 O5 -66.8(3) . . . . ?

C19 C14 C15 O5 54.7(3) . . . . ?

C9 C14 C15 C6 54.3(3) . . . . ?

C13 C14 C15 C6 171.9(3) . . . . ?

C19 C14 C15 C6 -66.6(3) . . . . ?

C15 O5 C17 C20 -124.8(4) . . . . ?

C15 O5 C17 C18 3.2(4) . . . . ?

C4 C5 C18 C19 140.8(4) . . . . ?

C6 C5 C18 C19 -55.4(4) . . . . ?

C4 C5 C18 C17 -103.2(4) . . . . ?

C6 C5 C18 C17 60.7(3) . . . . ?

O5 C17 C18 C5 -60.5(3) . . . . ?

C20 C17 C18 C5 63.0(4) . . . . ?

O5 C17 C18 C19 60.6(4) . . . . ?

C20 C17 C18 C19 -175.8(3) . . . . ?

C5 C18 C19 O6 -75.3(4) . . . . ?

C17 C18 C19 O6 169.5(3) . . . . ?

C5 C18 C19 C14 51.2(4) . . . . ?

C17 C18 C19 C14 -64.1(3) . . . . ?

C9 C14 C19 O6 10.3(4) . . . . ?

C13 C14 C19 O6 -112.3(3) . . . . ?

C15 C14 C19 O6 131.4(3) . . . . ?

C9 C14 C19 C18 -113.7(3) . . . . ?

C13 C14 C19 C18 123.7(3) . . . . ?

C15 C14 C19 C18 7.4(3) . . . . ?

 

loop_

 _geom_hbond_atom_site_label_D

 _geom_hbond_atom_site_label_H

 _geom_hbond_atom_site_label_A

 _geom_hbond_distance_DH

 _geom_hbond_distance_HA

 _geom_hbond_distance_DA

 _geom_hbond_angle_DHA

 _geom_hbond_site_symmetry_A

O6 H6 O3  0.82 1.98 2.783(4) 167.2 2_554

 

_diffrn_measured_fraction_theta_max    0.952

_diffrn_reflns_theta_full              28.33

_diffrn_measured_fraction_theta_full   0.982

_refine_diff_density_max    0.159

_refine_diff_density_min   -0.352

_refine_diff_density_rms    0.039
